# Supplementary material for: Validity and Reliability of Automatically Generated Propositional Reasoning Items
Source: Atypon-hosted journal article supplement (doi:10.1027/1015-5759/a000616), 2020-11-10
Supplement: 1015-5759_a000616_esm1.pdf [file 1015-5759_a000616_esm1.pdf]

Online Supplement to: Evidence on the validity and reliability of automatically generated propositional reasoning items: A multilingual study of the challenges of automatic generation of verbal items

Daniela Gühne and Philipp Doebler  
TU Dortmund University

David M. Condon  
University of Oregon

Fang Luo  
Beijing Normal University

Luning Sun  
University of Cambridge

Author Note

Daniela Gühne and Philipp Doebler, Department of Statistics, TU Dortmund University, Dortmund, Germany; David M. Condon, Department of Psychology, University of Oregon, Eugene, United States; Fang Luo, Faculty of Psychology, Beijing Normal University, Beijing, China; Luning Sun, The Psychometrics Centre, Cambridge Judge Business School, University of Cambridge, Cambridge, United Kingdom.

The work of Fang Luo was supported by the National Key R&D Program of China (Grant No. 2018YFC0810602). The work by Daniela Gühne and Philipp Doebler was supported by grant DO 1789/1-1 from the German Research Foundation (DFG). The work of Luning Sun was supported by the Economic and Social Research Council, UK (ESRC; Grant No. ES/L016591/1).

Correspondence concerning this article should be addressed to Philipp Doebler, Department of Statistics, TU Dortmund University, Dortmund, Germany.

Email: [doebler@statistik.tu-dortmund.de](mailto:doebler@statistik.tu-dortmund.de)

## Abstract

This online supplement reports details on the confirmatory factor analysis, the linear mixed models for the Chinese- and German-speaking samples, and item characteristic curves. All data and code is freely available at <https://osf.io/xa9gw/>.

Online Supplement to: Evidence on the validity and reliability of automatically generated propositional reasoning items: A multilingual study of the challenges of automatic generation of verbal items

**Details on the CFA model**

Table 1 contains further details on the confirmatory factor analysis model used for the analysis of the tetrachoric correlations, which were computed from the English-speaking sample. Note that the number of pairwise administrations varied, so that the  $\chi^2$ -value is omitted intentionally. Instead the SRMR is employed, as it is not biased by sample size.

Table E1  
*Detailed CFA results*

|            |        | Model                  |           |       |      |
|------------|--------|------------------------|-----------|-------|------|
|            |        | Estimate               | Std. Err. | z     | p    |
|            |        | <u>Factor Loadings</u> |           |       |      |
| <u>VR</u>  |        |                        |           |       |      |
|            | VR.04  | 0.81                   | 0.03      | 24.86 | .000 |
|            | VR.16  | 0.46                   | 0.04      | 12.38 | .000 |
|            | VR.19  | 0.50                   | 0.04      | 13.68 | .000 |
|            | VR.17  | 0.73                   | 0.03      | 21.60 | .000 |
| <u>R3D</u> |        |                        |           |       |      |
|            | R3D.03 | 0.74                   | 0.03      | 21.95 | .000 |
|            | R3D.04 | 0.76                   | 0.03      | 22.83 | .000 |
|            | R3D.06 | 0.68                   | 0.03      | 19.69 | .000 |
|            | R3D.08 | 0.67                   | 0.03      | 19.22 | .000 |
| <u>LN</u>  |        |                        |           |       |      |
|            | LN.58  | 0.75                   | 0.03      | 23.01 | .000 |
|            | LN.34  | 0.75                   | 0.03      | 23.23 | .000 |
|            | LN.33  | 0.77                   | 0.03      | 23.68 | .000 |
|            | LN.07  | 0.76                   | 0.03      | 23.33 | .000 |
| <u>MR</u>  |        |                        |           |       |      |
|            | MR.45  | 0.55                   | 0.04      | 14.92 | .000 |
|            | MR.46  | 0.63                   | 0.04      | 17.41 | .000 |
|            | MR.47  | 0.62                   | 0.04      | 17.13 | .000 |
|            | MR.55  | 0.58                   | 0.04      | 15.85 | .000 |
| <u>PR</u>  |        |                        |           |       |      |
|            | item1  | 0.50                   | 0.03      | 14.70 | .000 |
|            | item2  | 0.51                   | 0.03      | 14.91 | .000 |
|            | item3  | 0.54                   | 0.03      | 16.07 | .000 |

|        |      |                           |       |      |
|--------|------|---------------------------|-------|------|
| item4  | 0.65 | 0.03                      | 20.07 | .000 |
| item5  | 0.85 | 0.03                      | 29.38 | .000 |
| item6  | 0.80 | 0.03                      | 26.47 | .000 |
| item7  | 0.69 | 0.03                      | 21.73 | .000 |
| item8  | 0.71 | 0.03                      | 22.74 | .000 |
| item9  | 0.87 | 0.03                      | 30.62 | .000 |
| item10 | 0.81 | 0.03                      | 27.06 | .000 |
| item11 | 0.84 | 0.03                      | 28.73 | .000 |
| item12 | 0.81 | 0.03                      | 27.21 | .000 |
| item13 | 0.30 | 0.04                      | 8.46  | .000 |
| item14 | 0.32 | 0.04                      | 8.95  | .000 |
| item15 | 0.36 | 0.04                      | 10.30 | .000 |
| item16 | 0.30 | 0.04                      | 8.47  | .000 |
| item17 | 0.46 | 0.03                      | 13.30 | .000 |
| item18 | 0.31 | 0.04                      | 8.65  | .000 |
| item19 | 0.86 | 0.03                      | 29.89 | .000 |
| item20 | 0.83 | 0.03                      | 28.40 | .000 |
| item21 | 0.80 | 0.03                      | 26.76 | .000 |
| item22 | 0.77 | 0.03                      | 25.11 | .000 |
| item23 | 0.74 | 0.03                      | 23.81 | .000 |
| item24 | 0.76 | 0.03                      | 24.81 | .000 |
| item25 | 0.87 | 0.03                      | 30.19 | .000 |
| item26 | 0.88 | 0.03                      | 30.81 | .000 |
| item27 | 0.78 | 0.03                      | 25.66 | .000 |
| item28 | 0.64 | 0.03                      | 19.77 | .000 |
| item29 | 0.74 | 0.03                      | 23.81 | .000 |
| item30 | 0.75 | 0.03                      | 24.18 | .000 |
|        |      | <u>Residual Variances</u> |       |      |
| VR.04  | 0.34 | 0.03                      | 12.18 | .000 |
| VR.16  | 0.79 | 0.04                      | 18.66 | .000 |
| VR.19  | 0.75 | 0.04                      | 18.40 | .000 |
| VR.17  | 0.47 | 0.03                      | 15.35 | .000 |
| R3D.03 | 0.45 | 0.03                      | 14.82 | .000 |
| R3D.04 | 0.42 | 0.03                      | 14.12 | .000 |
| R3D.06 | 0.54 | 0.03                      | 16.22 | .000 |
| R3D.08 | 0.56 | 0.03                      | 16.46 | .000 |
| LN.58  | 0.44 | 0.03                      | 15.58 | .000 |
| LN.34  | 0.43 | 0.03                      | 15.45 | .000 |
| LN.33  | 0.41 | 0.03                      | 15.16 | .000 |
| LN.07  | 0.43 | 0.03                      | 15.39 | .000 |
| MR.45  | 0.69 | 0.04                      | 17.36 | .000 |
| MR.46  | 0.60 | 0.04                      | 16.16 | .000 |
| MR.47  | 0.61 | 0.04                      | 16.32 | .000 |
| MR.55  | 0.66 | 0.04                      | 16.97 | .000 |

|                             |      |      |       |      |
|-----------------------------|------|------|-------|------|
| item1                       | 0.75 | 0.04 | 19.42 | .000 |
| item2                       | 0.74 | 0.04 | 19.41 | .000 |
| item3                       | 0.71 | 0.04 | 19.36 | .000 |
| item4                       | 0.58 | 0.03 | 19.16 | .000 |
| item5                       | 0.27 | 0.02 | 17.88 | .000 |
| item6                       | 0.37 | 0.02 | 18.45 | .000 |
| item7                       | 0.52 | 0.03 | 19.03 | .000 |
| item8                       | 0.49 | 0.03 | 18.95 | .000 |
| item9                       | 0.24 | 0.01 | 17.51 | .000 |
| item10                      | 0.35 | 0.02 | 18.35 | .000 |
| item11                      | 0.29 | 0.02 | 18.04 | .000 |
| item12                      | 0.34 | 0.02 | 18.34 | .000 |
| item13                      | 0.91 | 0.05 | 19.57 | .000 |
| item14                      | 0.90 | 0.05 | 19.56 | .000 |
| item15                      | 0.87 | 0.04 | 19.54 | .000 |
| item16                      | 0.91 | 0.05 | 19.57 | .000 |
| item17                      | 0.79 | 0.04 | 19.46 | .000 |
| item18                      | 0.90 | 0.05 | 19.57 | .000 |
| item19                      | 0.26 | 0.01 | 17.71 | .000 |
| item20                      | 0.30 | 0.02 | 18.07 | .000 |
| item21                      | 0.36 | 0.02 | 18.45 | .000 |
| item22                      | 0.41 | 0.02 | 18.68 | .000 |
| item23                      | 0.45 | 0.02 | 18.84 | .000 |
| item24                      | 0.42 | 0.02 | 18.73 | .000 |
| item25                      | 0.25 | 0.01 | 17.55 | .000 |
| item26                      | 0.23 | 0.01 | 17.35 | .000 |
| item27                      | 0.39 | 0.02 | 18.63 | .000 |
| item28                      | 0.59 | 0.03 | 19.17 | .000 |
| item29                      | 0.45 | 0.02 | 18.85 | .000 |
| item30                      | 0.44 | 0.02 | 18.81 | .000 |
| <u>Residual Covariances</u> |      |      |       |      |
| item1 w/item2               | 0.52 | 0.03 | 15.70 | .000 |
| item3 w/item4               | 0.43 | 0.03 | 15.31 | .000 |
| item5 w/item6               | 0.10 | 0.01 | 7.39  | .000 |
| item7 w/item8               | 0.19 | 0.02 | 9.20  | .000 |
| item9 w/item10              | 0.13 | 0.01 | 10.05 | .000 |
| item11 w/item12             | 0.10 | 0.01 | 7.60  | .000 |
| item13 w/item14             | 0.55 | 0.04 | 14.47 | .000 |
| item15 w/item16             | 0.51 | 0.04 | 13.75 | .000 |
| item17 w/item18             | 0.43 | 0.03 | 12.55 | .000 |
| item19 w/item20             | 0.09 | 0.01 | 7.32  | .000 |
| item21 w/item22             | 0.14 | 0.02 | 9.12  | .000 |
| item23 w/item24             | 0.21 | 0.02 | 11.34 | .000 |
| item25 w/item26             | 0.06 | 0.01 | 6.29  | .000 |

|                 |                           |      |       |      |
|-----------------|---------------------------|------|-------|------|
| item27 w/item28 | 0.22                      | 0.02 | 11.04 | .000 |
| item29 w/item30 | 0.25                      | 0.02 | 12.82 | .000 |
|                 | <u>Latent Variances</u>   |      |       |      |
| VR              | 1.00 <sup>+</sup>         |      |       |      |
| R3D             | 1.00 <sup>+</sup>         |      |       |      |
| LN              | 1.00 <sup>+</sup>         |      |       |      |
| MR              | 1.00 <sup>+</sup>         |      |       |      |
| PR              | 1.00 <sup>+</sup>         |      |       |      |
|                 | <u>Latent Covariances</u> |      |       |      |
| VR w/R3D        | 0.66                      | 0.03 | 21.55 | .000 |
| VR w/LN         | 0.70                      | 0.03 | 25.24 | .000 |
| VR w/MR         | 0.74                      | 0.03 | 23.54 | .000 |
| VR w/PR         | 0.67                      | 0.03 | 25.94 | .000 |
| R3D w/LN        | 0.53                      | 0.03 | 15.59 | .000 |
| R3D w/MR        | 0.67                      | 0.03 | 20.28 | .000 |
| R3D w/PR        | 0.53                      | 0.03 | 17.43 | .000 |
| LN w/MR         | 0.72                      | 0.03 | 24.04 | .000 |
| LN w/PR         | 0.55                      | 0.03 | 18.78 | .000 |
| MR w/PR         | 0.61                      | 0.03 | 19.36 | .000 |
|                 | <u>Fit Indices</u>        |      |       |      |
| NPAR            | 117.00                    |      |       |      |
| DF              | 964.00                    |      |       |      |
| SRMR            | 0.08                      |      |       |      |

---

<sup>+</sup>Fixed parameter

### Detailed regression results

Table 2 reports all details of the linear mixed models in the Chinese-speaking sample and Table 3 contains the results for the German-speaking sample.

Table E2  
*Prediction of PR total scores (Chinese-speaking sample).*

|                                                                    | model C1       | model C2       | model C3       |
|--------------------------------------------------------------------|----------------|----------------|----------------|
| <b>fixed effects, <math>\beta</math> (<math>SE_{\beta}</math>)</b> |                |                |                |
| intercept                                                          | 9.78*** (0.38) | 9.49*** (0.48) | 5.38*** (0.57) |
| test version (B)                                                   |                | 0.60 (0.64)    | 0.74 (0.38)    |
| ICAR16 <sup>1</sup>                                                |                |                | 0.47*** (0.06) |
| <b>random effects, <math>SD</math></b>                             |                |                |                |
| class                                                              | 1.01           | 0.95           | < 0.01         |
| error                                                              | 3.15           | 3.16           | 2.90           |
| <b>model comparison</b>                                            |                |                |                |
| $\chi^2$ ( $df$ )                                                  |                | 1.07 (1)       | 52.79*** (1)   |
| AIC                                                                | 1244.0         | 1244.9         | 1194.1         |
| BIC                                                                | 1254.4         | 1258.8         | 1211.5         |

*Note.* For binary variables the reference category is given in brackets. Model C2 is contrasted with model C1. Model C3 is contrasted with model C2.  $\chi^2$ : likelihood ratio test statistic for nested models; <sup>1</sup> total score; \*  $p < .05$ ; \*\*  $p < .01$ ; \*\*\*  $p < .001$



Table E3  
*Prediction of PR total scores (German-speaking sample).*

|                                                                    | model G1        | model G2        | model G3       | model G4       |
|--------------------------------------------------------------------|-----------------|-----------------|----------------|----------------|
| <b>fixed effects, <math>\beta</math> (<math>SE_{\beta}</math>)</b> |                 |                 |                |                |
| intercept                                                          | 11.49*** (0.22) | 11.44*** (0.29) | 4.20* (1.62)   | 3.57* (1.40)   |
| test version (B)                                                   |                 | -0.09 (0.21)    | -0.06 (0.20)   | -0.08 (0.20)   |
| session (2)                                                        |                 | 0.26 (0.21)     | 0.34 (0.21)    | 0.36 (0.21)    |
| form (pen and paper)                                               |                 | -0.08 (0.21)    | -0.10 (0.20)   | -0.05 (0.20)   |
| QCM anxiety <sup>2</sup>                                           |                 |                 | 0.08 (0.15)    | 0.17 (0.13)    |
| QCM challenge <sup>2</sup>                                         |                 |                 | 0.29 (0.18)    | 0.38* (0.17)   |
| QCM interest <sup>2</sup>                                          |                 |                 | 0.17 (0.17)    | -0.11 (0.16)   |
| QCM success <sup>2</sup>                                           |                 |                 | 0.05 (0.18)    | 0.10 (0.16)    |
| S-C test <sup>1</sup>                                              |                 |                 | 0.04*** (0.01) | 0.01 (0.01)    |
| ICAR16 <sup>1</sup>                                                |                 |                 |                | 0.45*** (0.06) |
| <b>random effects, <math>SD</math></b>                             |                 |                 |                |                |
| person                                                             | 2.05            | 2.05            | 1.85           | 1.38           |
| error                                                              | 1.49            | 1.50            | 1.47           | 1.47           |
| <b>model comparison</b>                                            |                 |                 |                |                |
| $\chi^2$ ( $df$ )                                                  |                 | 2.00 (3)        | 26.57*** (5)   | 43.98*** (1)   |
| AIC                                                                | 941.4           | 945.4           | 928.8          | 886.8          |
| BIC                                                                | 951.4           | 965.5           | 965.7          | 927.1          |

*Note.* For binary variables the reference category is given in brackets. Model G2 is contrasted with model G1. Model G3 is contrasted with model G2. Model G4 is contrasted with model G3.  $\chi^2$ : likelihood ratio test statistic for nested models; <sup>1</sup> total score; <sup>2</sup> mean score; \*  $p < .05$ ; \*\*  $p < .01$ ; \*\*\*  $p < .001$

### Item characteristic curves

Figure E1 contains the ICCs of the 15 PR item families from the 2PL models. The English- and Chinese-speaking samples from Studies 1 resp. 2 can be directly compared.

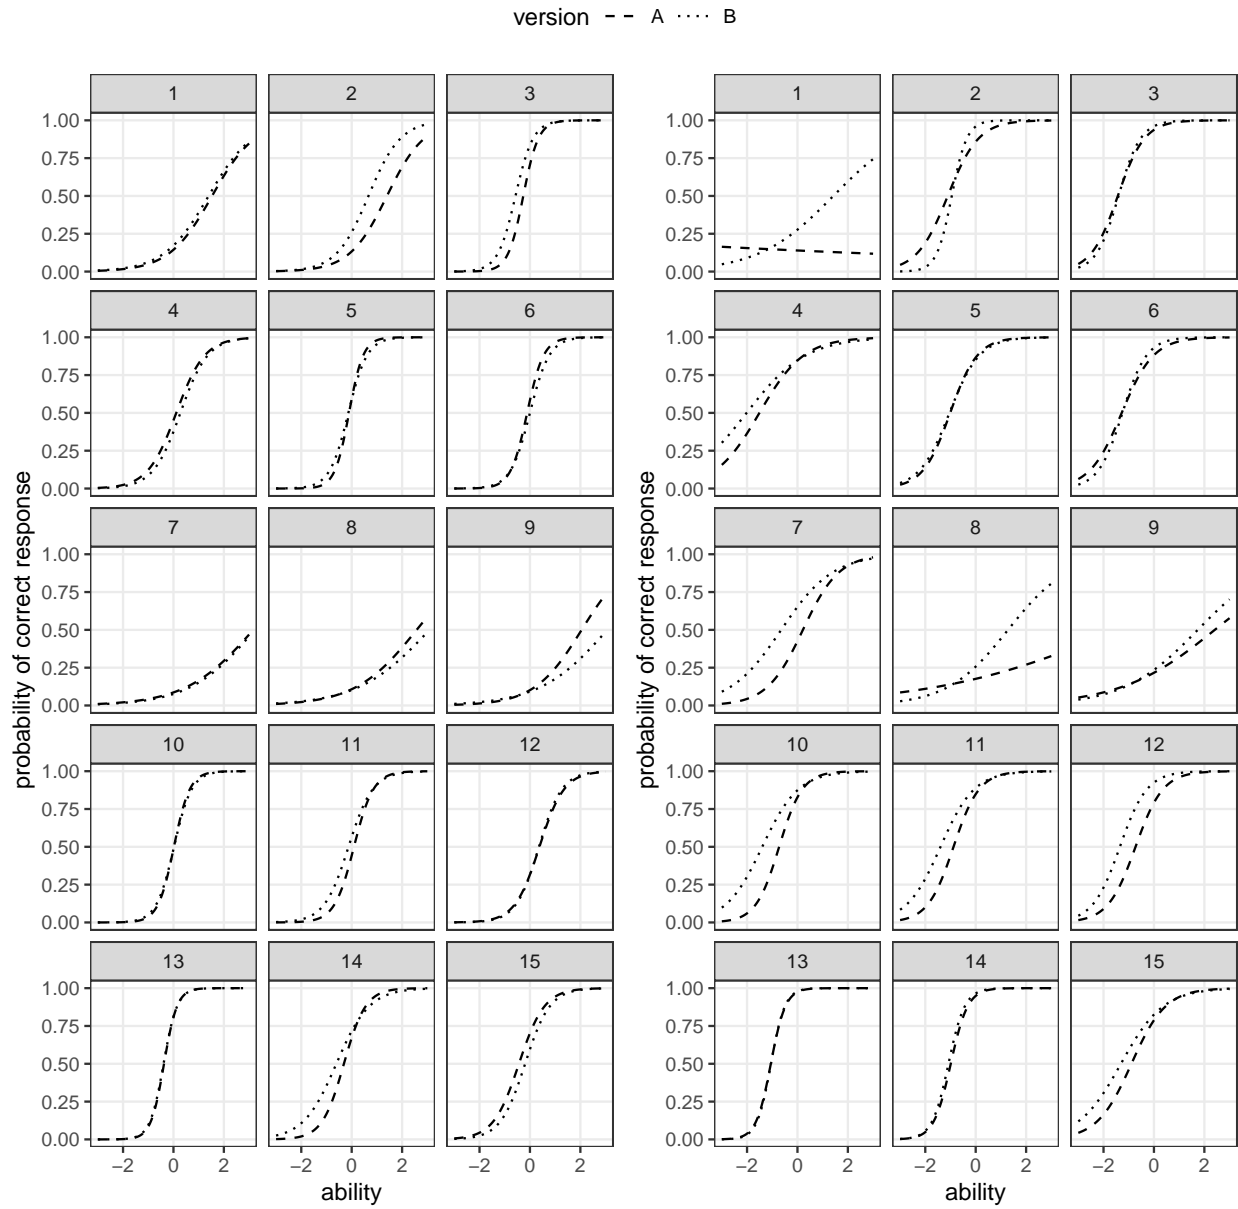

Figure E1. ICCs of PR item families 1-15 in 2PL model (left panel: English-speaking sample from Study 1; right panel: Chinese-speaking sample from Study 2).
